# Supplementary material
Source: PubMed Central journal article supplement (PMC4390820)
Supplement: mmc1.pdf [file mmc1.pdf]

**Biophysical Journal**

**Supporting Material**

**$^{13}\text{C}$ ,  $^2\text{H}$  NMR Studies of Structural and Dynamical Modifications of Glucose-Exposed Porcine Aortic Elastin**

Moshe C. Silverstein,<sup>1</sup> Kübra Bilici,<sup>1</sup> Steven W. Morgan,<sup>1</sup> Yunjie Wang,<sup>2</sup> Yanhang Zhang,<sup>2</sup> and Gregory S. Boutis<sup>1,\*</sup>

<sup>1</sup>Department of Physics, Brooklyn College, The City University of New York, Brooklyn, New York; and <sup>2</sup>Department of Mechanical Engineering and Department of Biomedical Engineering, Boston University, Boston, Massachusetts

Table S1: Amino acid analysis (expressed in % per mole based on the molecular weight of bovine nuchal ligament elastin, 61,310 g/mol) for a sample of porcine aortic elastin used in this study [33].

| Amino Acid | Porcine aortic elastin (this work) | Bovine nuchal ligament elastin |
|------------|------------------------------------|--------------------------------|
| Cys        | 0.0                                | 0.3                            |
| Hyp        | 0.0                                | -                              |
| Asp        | 0.6                                | 0.4                            |
| Thr        | 1.4                                | 1.2                            |
| Ser        | 1.1                                | 0.9                            |
| Glu        | 2.0                                | 1.3                            |
| Pro        | 11.4                               | 12.3                           |
| Gly        | 31.4                               | 33.8                           |
| Ala        | 22.9                               | 22.2                           |
| Val        | 13.5                               | 13.3                           |
| Met        | 0.0                                | 0.0                            |
| Ile        | 1.9                                | 2.6                            |
| Leu        | 5.6                                | 5.6                            |
| Nle        | 0.0                                | -                              |
| Tyr        | 1.9                                | 1.0                            |
| Phe        | 4.9                                | 6.1                            |
| His        | 0.0                                | 0.0                            |
| Hlys       | 0.0                                | -                              |
| Lys        | 0.7                                | 1.0                            |
| Arg        | 0.7                                | 0.7                            |

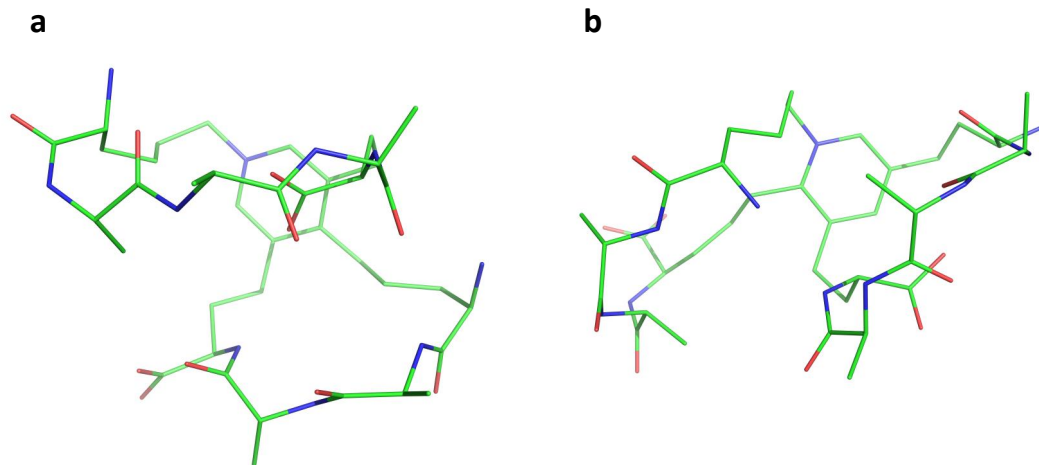

Figure S1: Desmosine (a) and isodesmosine (b) molecules used for the simulations. Two or three alanine residues are bonded to the terminals of the desmosine cross links.

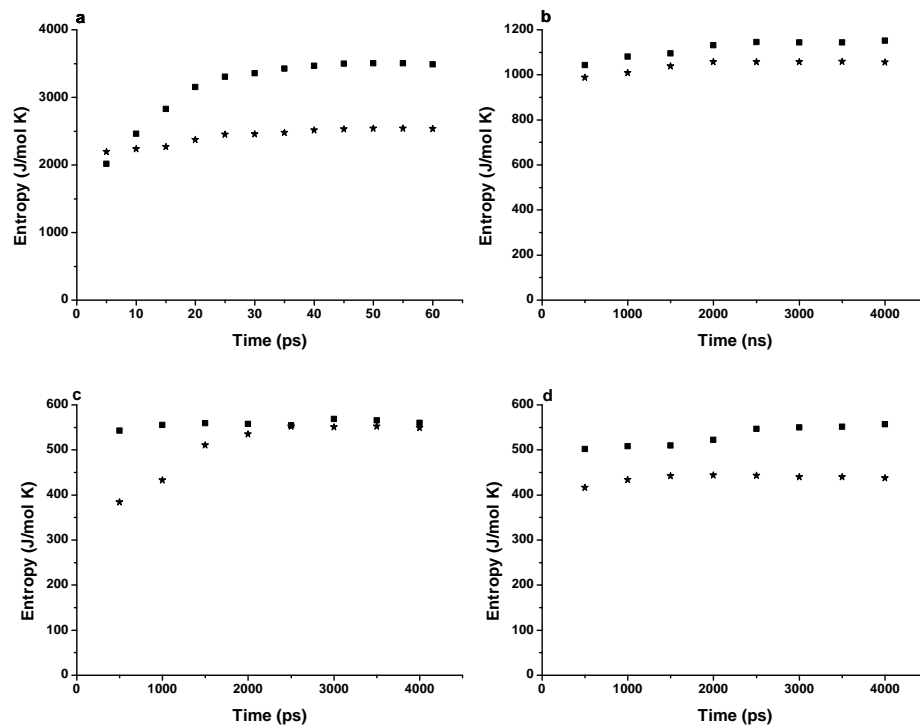

Figure S2: Entropy, determined from the quasi harmonic approach described in the text, as a function of sampling time for (a) relaxed and (b) strained  $[VPGVG]_5$  and (c) relaxed and (d) strained  $[AAAAA]$  pentamer. In all cases we observe the entropy approaches an asymptotic value. The squares are the samples in water and the stars are the samples in the 2 M glucose solution.

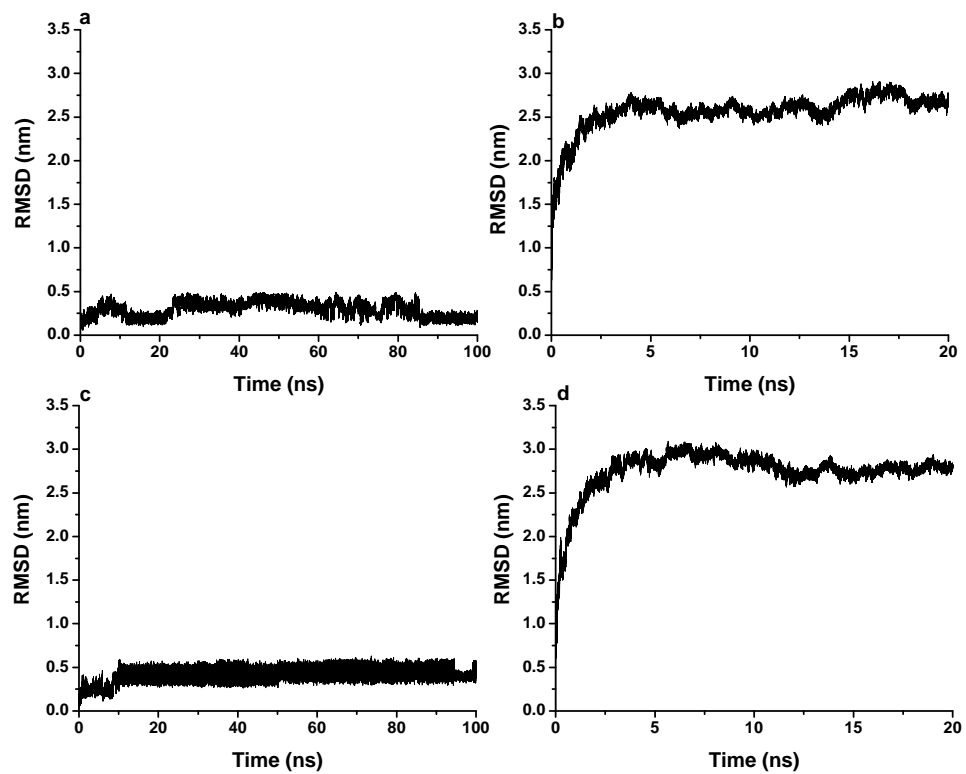

Figure S3: Root mean square deviation (RMSD) of all  $C_{\alpha}$  as a function of time for (a) desmosine in water, (b) desmosine in 2M glucose solution, (c) isodesmosine in water, and (d) isodesmosine in 2M glucose solution.
